# Supplementary material
Source: PubMed Central journal article supplement (PMC6358213)
Supplement: NIHMS998012-supplement-Figures.pdf [file NIHMS998012-supplement-Figures.pdf]

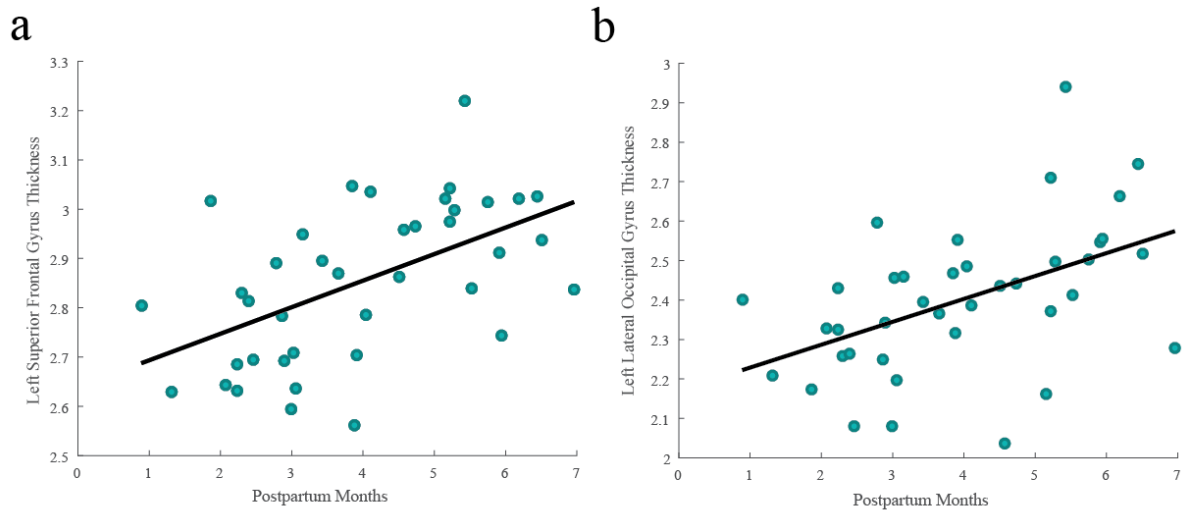

**Supplementary Figure 1.** (a) Scatter plot of the relationship between postpartum months and left superior frontal gyrus cortical thickness; (b) scatter plot of the relationship between postpartum months and left lateral occipital gyrus cortical thickness.

**a**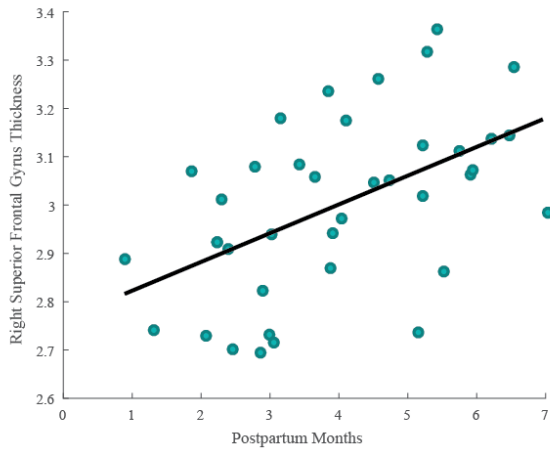**b**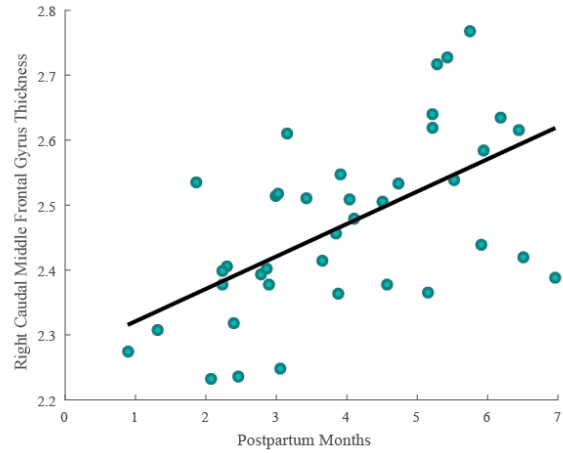**c**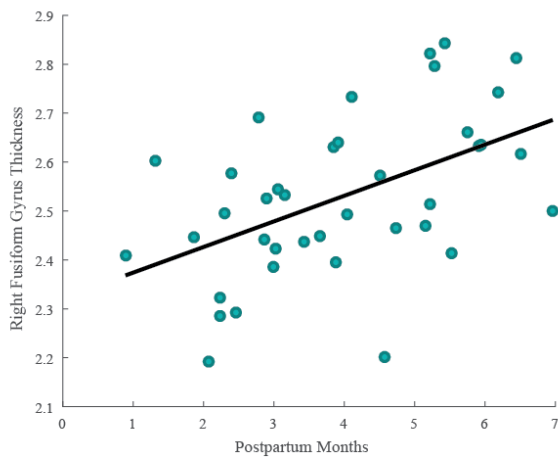**d**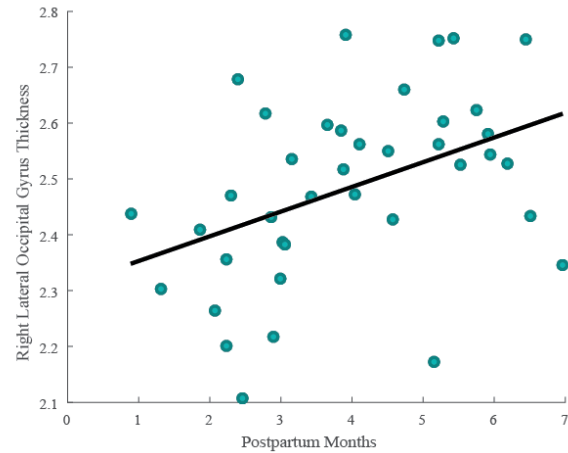

**Supplementary Figure 2.** (a) Scatter plot of the relationship between postpartum months and right superior frontal gyrus cortical thickness; (b) Scatter plot of the relationship between postpartum months and right caudal middle frontal gyrus cortical thickness; (c) scatter plot of the relationship between postpartum months and right fusiform gyrus cortical thickness; (d) scatter plot of the relationship between postpartum months and right lateral occipital gyrus cortical thickness.

a

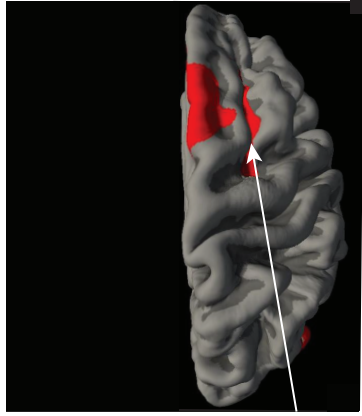

Right Caudal Middle Frontal Gyrus

b

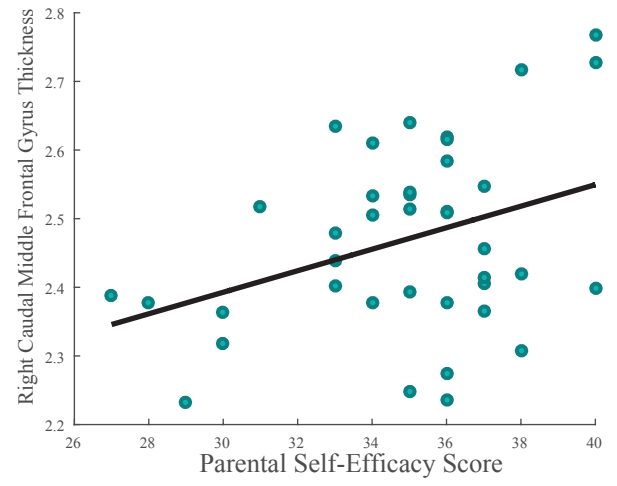

**Supplementary Figure 3.** (a) Significant cluster identified in the right caudal middle frontal gyrus; (b) a scatter plot of the relationship between the right caudal middle frontal gyrus and parental self-efficacy.

a

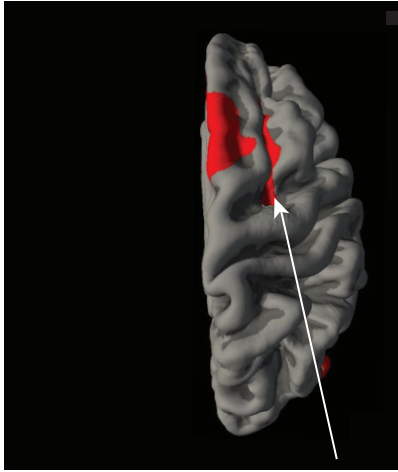

Right Superior Frontal Gyrus

b

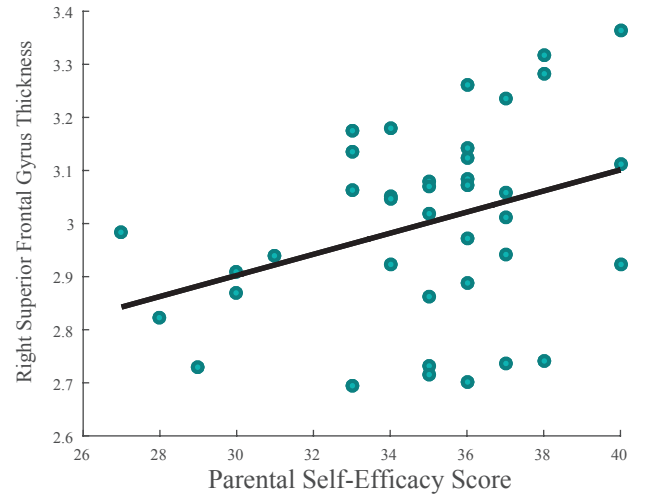

Supplementary Figure 3. (a) Significant cluster identified in the right superior frontal gyrus; (b) a scatter plot of the relationship between the right superior frontal gyrus and parental self-efficacy.
